# Supplementary material
Source: PubMed Central journal article supplement (PMC5373046)
Supplement: supp_pp.16.01489_PP2016-01489R2_Supplemental_Figures.pdf [file supp_pp.16.01489_PP2016-01489R2_Supplemental_Figures.pdf]

TYLCCNV

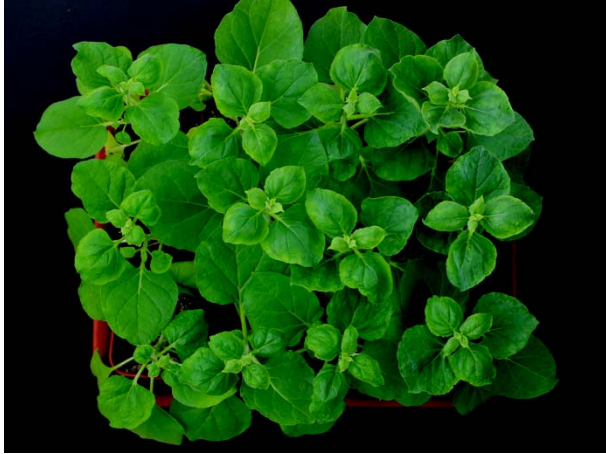

TYLCCNV-amiRPDS(319L)

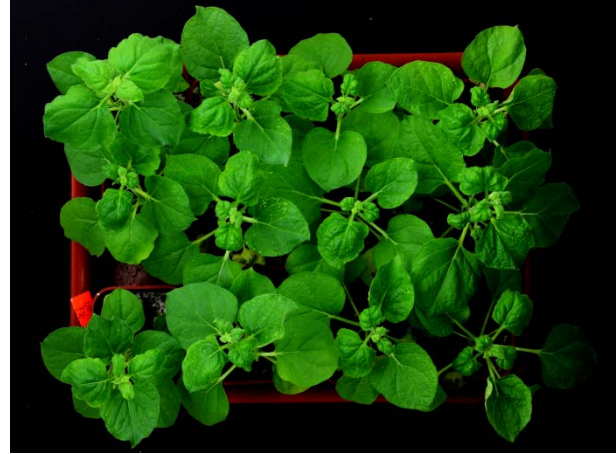

**Supplemental Figure S1.** Silence of *PDS* by TYLCCNV-amiRPDS(319L) in *N. benthamiana*. *PDS*-silencing phenotype in *N. benthamiana* plants inoculated with TYLCCNV-amiRPDS(319L). TYLCCNV empty vector inoculated plants were used as negative control. Photographs were taken at 30 dpi.

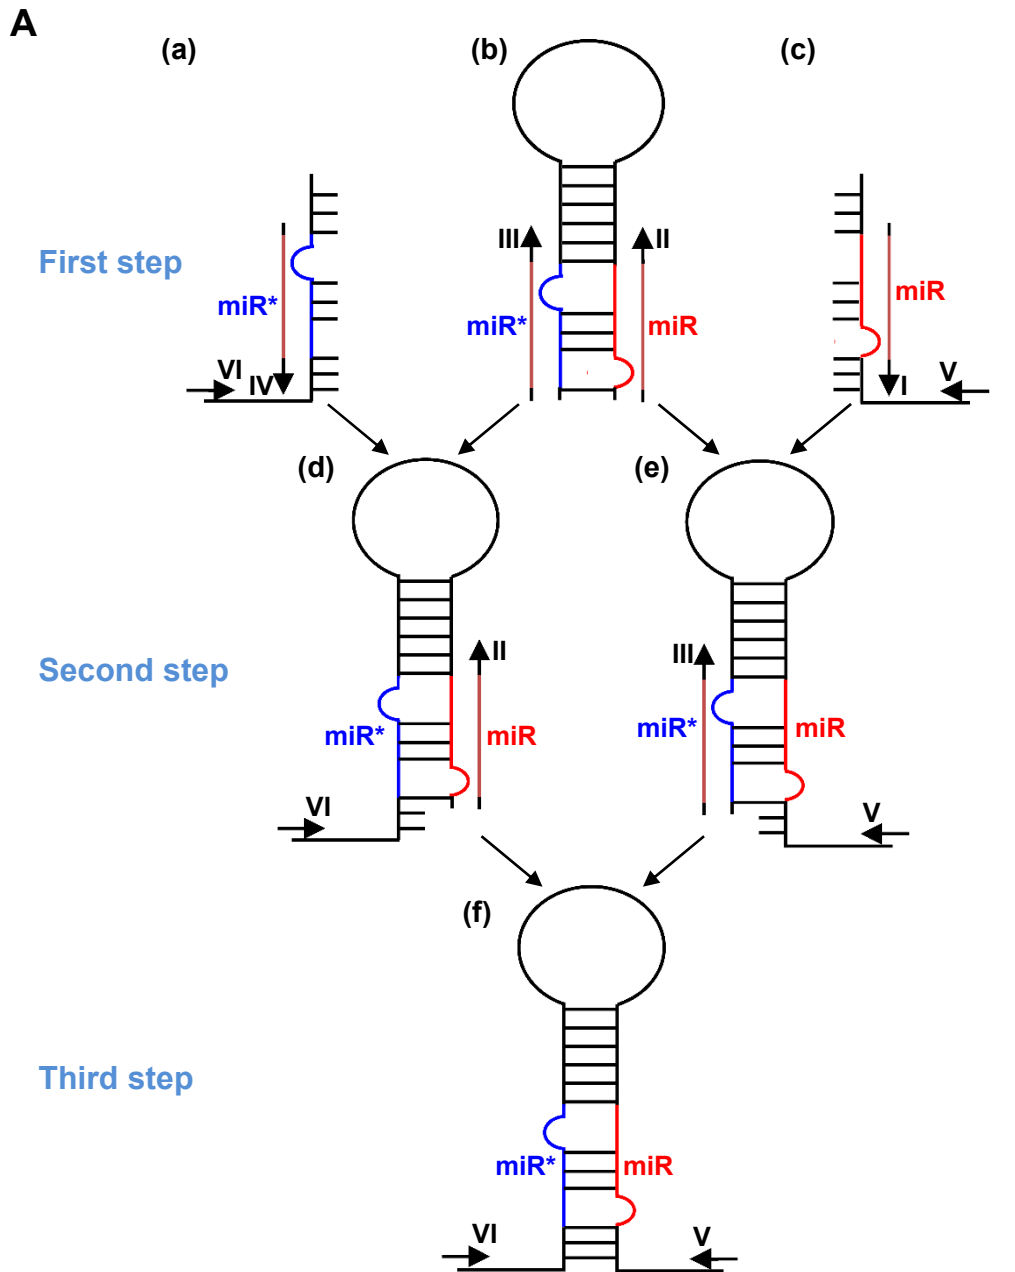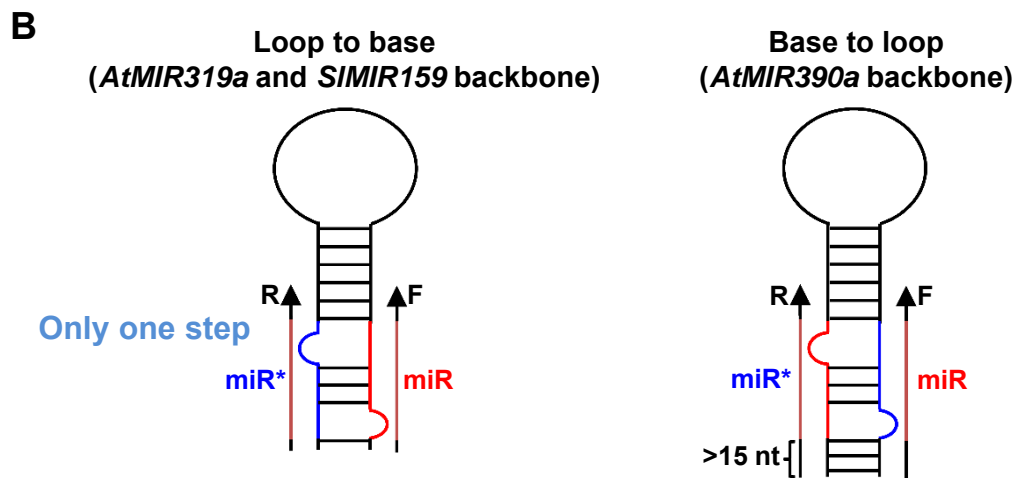

**Supplemental Figure S2.** Diagram of constructing amiRNA precursor by three-step and one-step PCR. A, Diagram of constructing amiRNA precursor by three-step PCR. I, II, III, IV, V and VI were the six primers. B, Diagram of constructing amiRNA precursor by only one-step PCR. F and R were the two primers. Sequence in red color meant amiRNA, and in blue color meant amiRNA\*. Bulge meant unmatched base.

**pri-amiRPDS(319)**

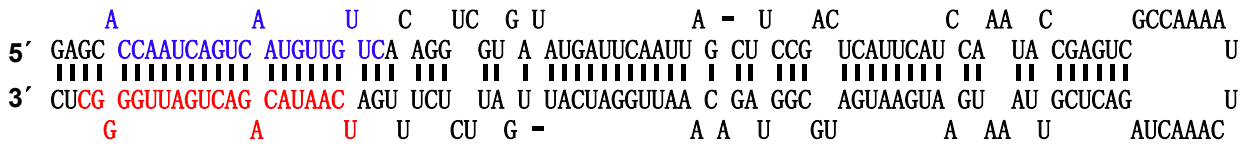

**pri-amiRPDS(159)**

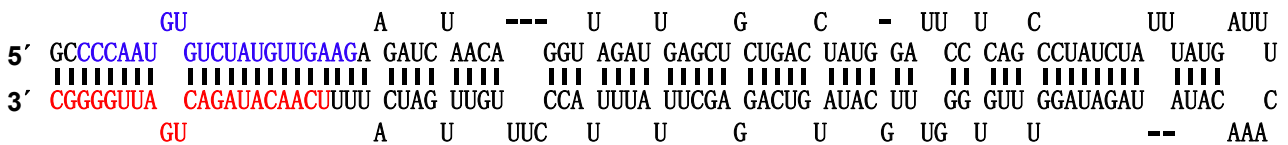

**pri-amiRPDS(390)**

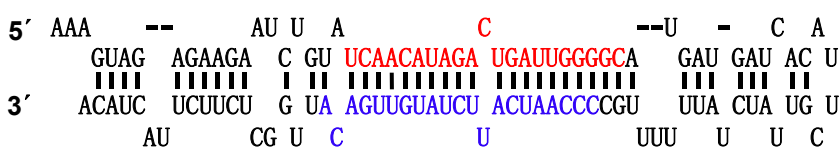

**Supplemental Figure S3.** Secondary structures of pri-amiRPDS(319), pri-amiRPDS(159), and pri-amiRPDS(390). Sequence in red color meant amiRNA, and in blue color meant amiRNA\*. Bulge meant unmatched base.

TYLCCNV

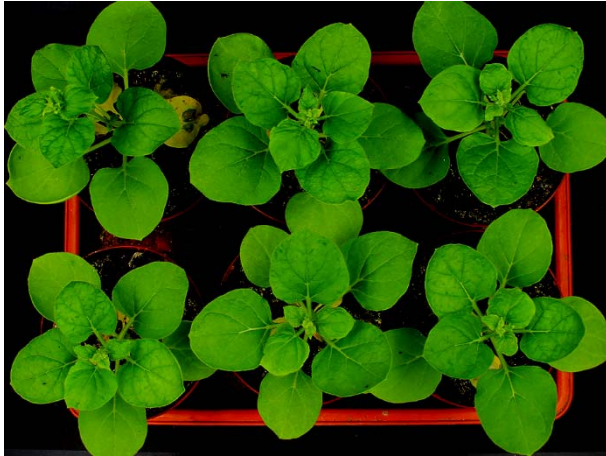

TYLCCNV-amiRPDS(319)

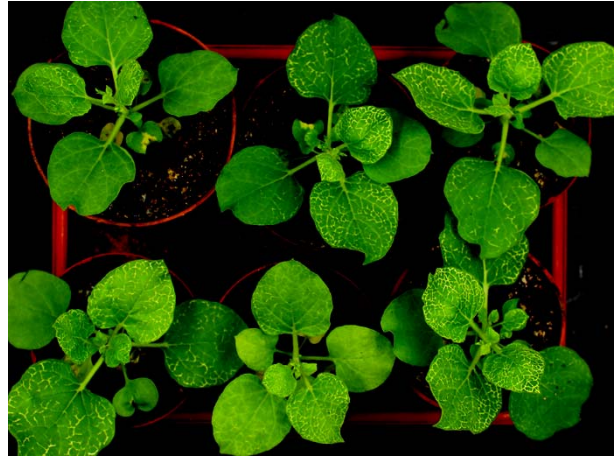

TYLCCNV-amiRPDS(159)

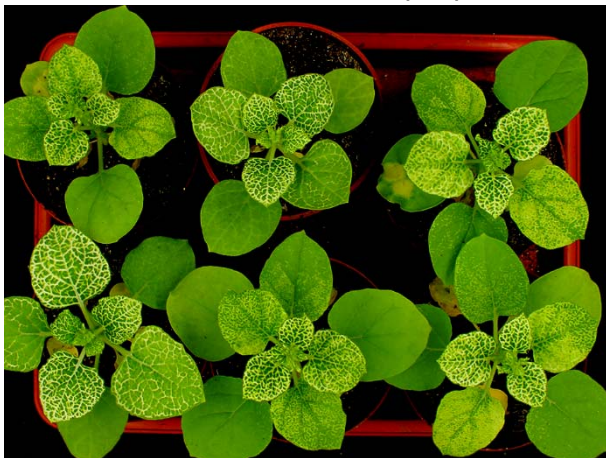

TYLCCNV-amiRPDS(390)

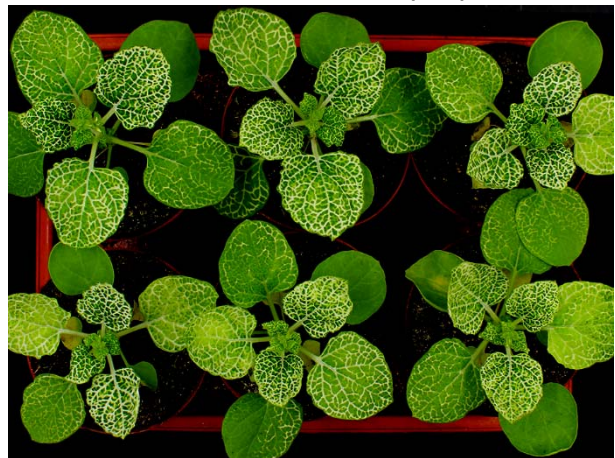

**Supplemental Figure S4.** Silence of *PDS* by TYLCCNV-amiRPDS vectors in different miRNA backbones in *N. benthamiana*. *PDS*-silencing phenotype in *N. benthamiana* plants inoculated with TYLCCNV-amiRPDS(319), TYLCCNV-amiRPDS(159) and TYLCCNV-amiRPDS(390). TYLCCNV empty vector inoculated plants were used as negative control. Photographs were taken at 25 dpi.

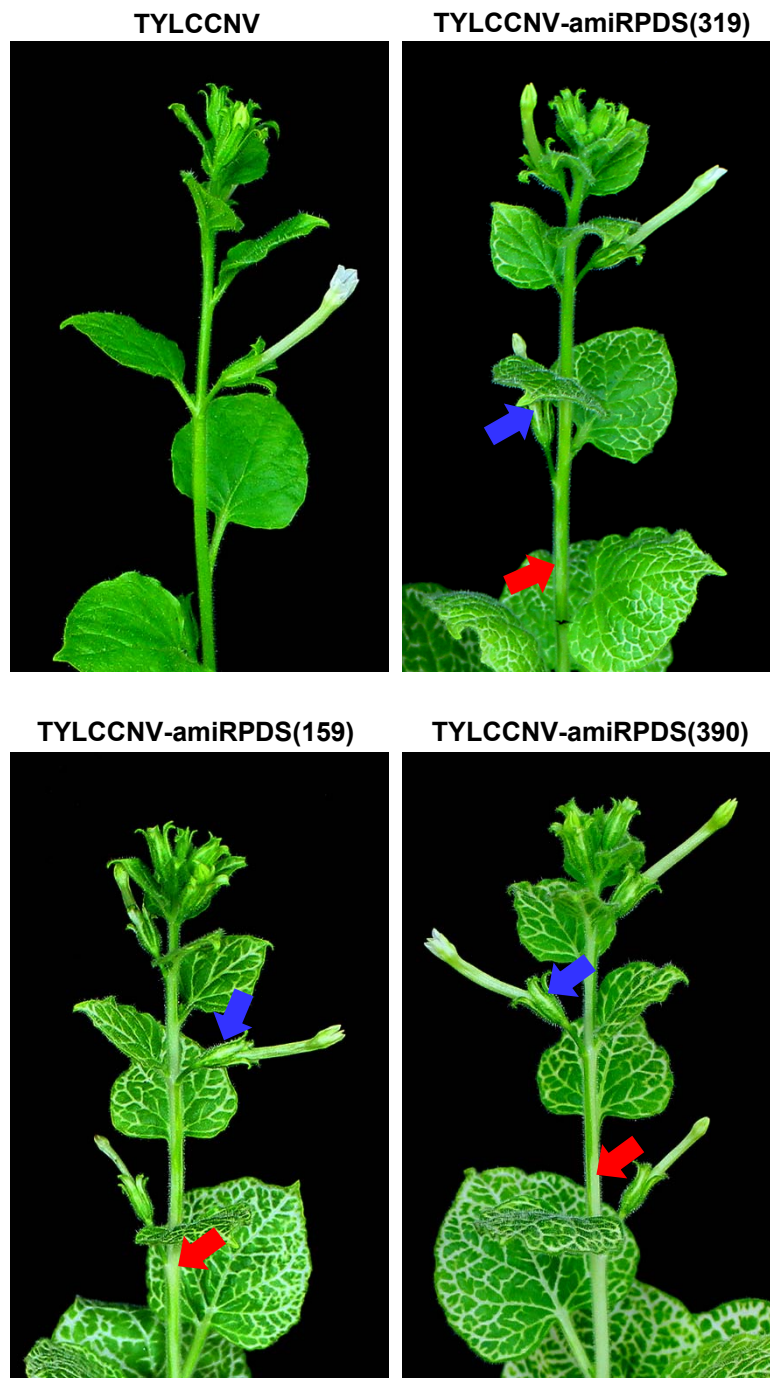

**Supplemental Figure S5.** Phenotype of amiRPDS precursors in different miRNA backbones at 45 dpi. *PDS*-silencing phenotype in *N. benthamiana* plants inoculated with TYLCCNV-amiRPDS(319), TYLCCNV-amiRPDS(159) and TYLCCNV-amiRPDS(390). TYLCCNV empty vector inoculated plants were used as negative control. Photographs were taken at 45 dpi.



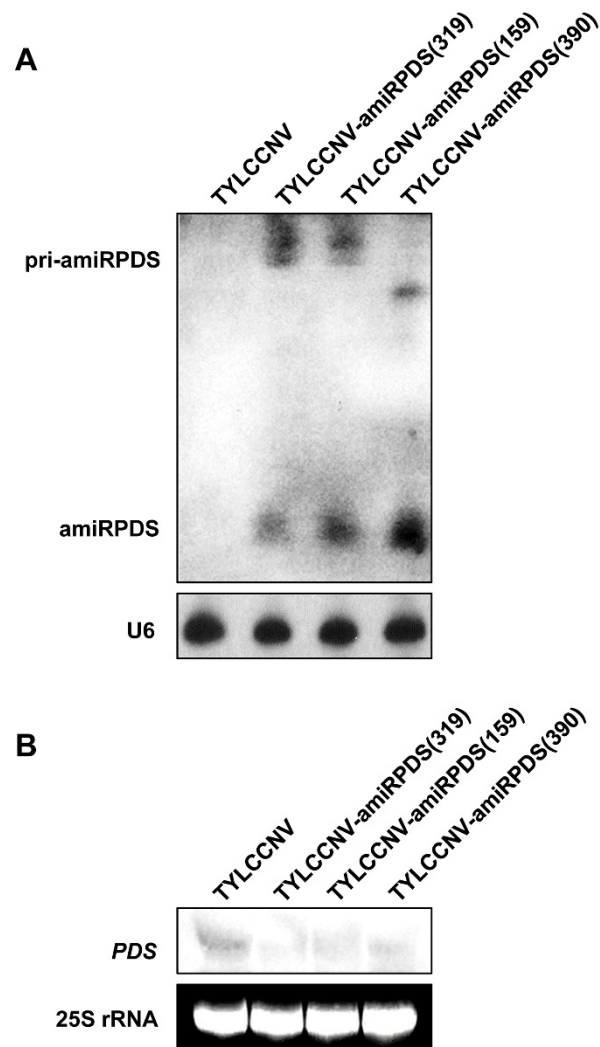

**Supplemental Figure S6.** Northern blot analysis of amiRPDS, pri-amiRPDS and *PDS* in plants inoculated with TYLCCNV or TYLCCNV-amiRPDS vectors in different miRNA backbones. A, Northern blot assays of amiRPDS and pri-amiRPDS in plants inoculated with TYLCCNV or TYLCCNV-amiRPDS vectors in different miRNA backbones. U6 was used as the loading control. B, Northern blot assays of *PDS* in plants inoculated with TYLCCNV or TYLCCNV-amiRPDS vectors in different miRNA backbones. GelStain (Transgen, Beijing) staining of 25S rRNA was used as the loading control.

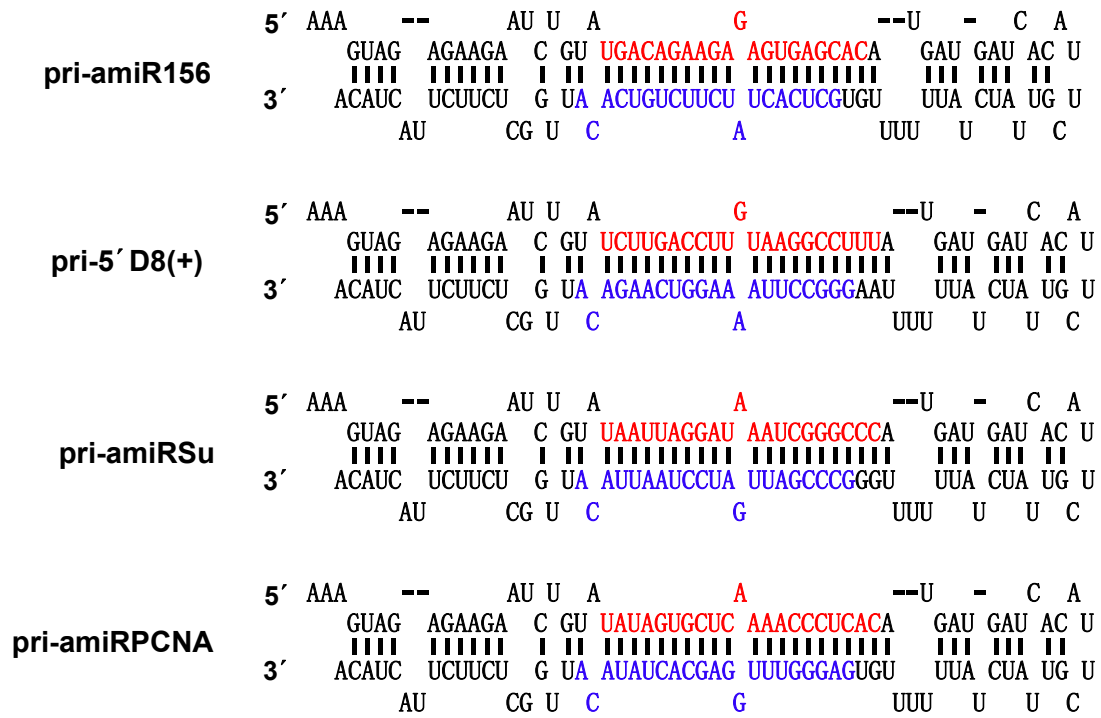

**Supplemental Figure S7.** Secondary structures of pri-amiR156, pri-5' D8(+), pri-amiRSu, and amiRPCNA. Sequence in red color meant amiRNA, and in blue color meant amiRNA\*. Bulge meant unmatched base.

TYLCCNV

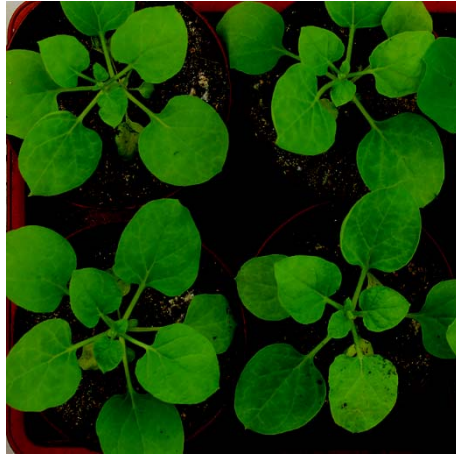

TYLCCNV-amiR156

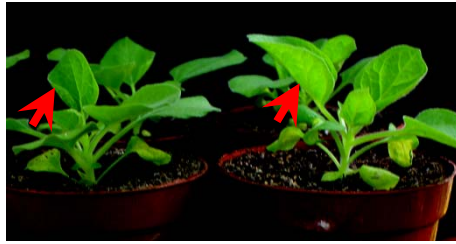

**Supplemental Figure S8.** Overexpression of miR156 by TYLCCNV-amiR156 in *N. benthamiana*. The phenotype of overexpressing miR156 in *N. benthamiana* plants inoculated with TYLCCNV-amiR156. TYLCCNV empty vector inoculated plants were used as negative control. Photographs were taken at 14 dpi.



TYLCCNV

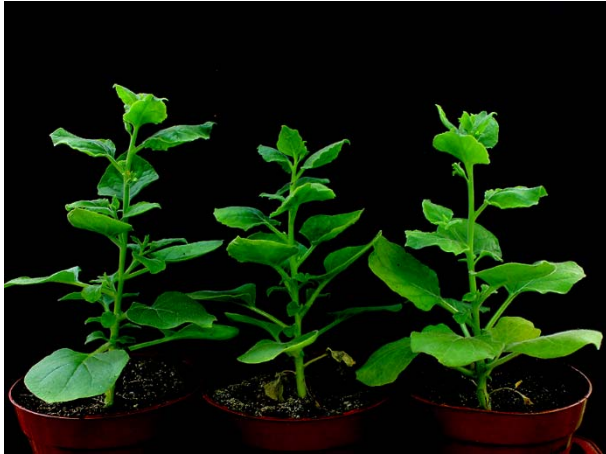

TYLCCNV-5'D8(+)

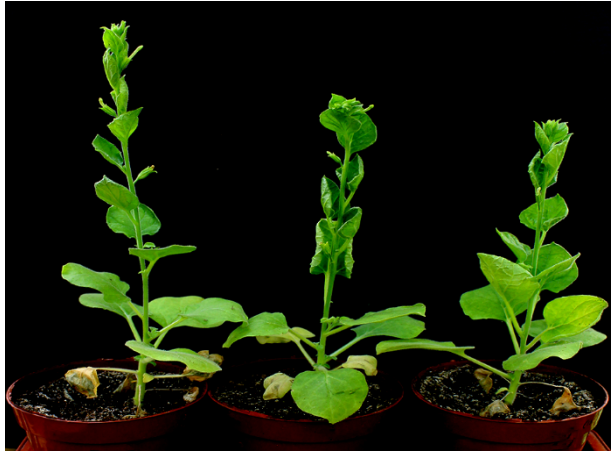

**Supplemental Figure S9.** Overexpression of 5'D8(+) by TYLCCNV-5'D8(+) in *N. benthamiana*. The phenotype of overexpressing 5'D8(+) in *N. benthamiana* plants inoculated with TYLCCNV-5'D8(+). TYLCCNV empty vector inoculated plants were used as negative control. Photographs were taken at 30 dpi.

**TYLCCNV**

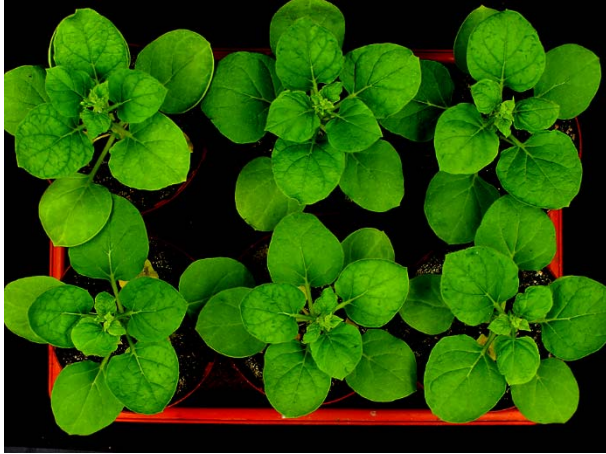

**TYLCCNV-amiRSu**

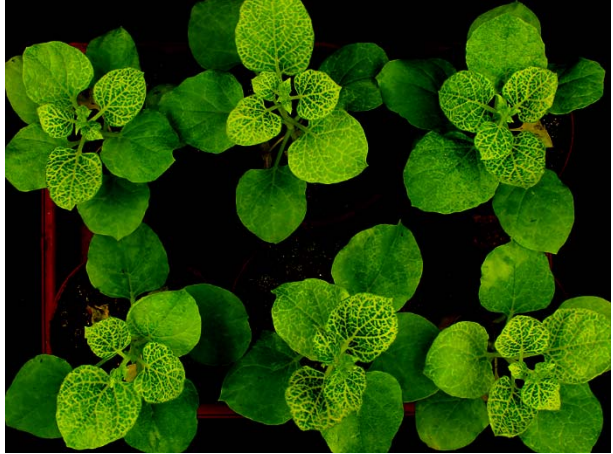

**Supplemental Figure S10.** Silence of *Su* by TYLCCNV-amiRSu in *N. benthamiana*. *Su*-silencing phenotype in *N. benthamiana* plants inoculated with TYLCCNV-amiRSu. TYLCCNV empty vector inoculated plants were used as negative control. Photographs were taken at 25 dpi.

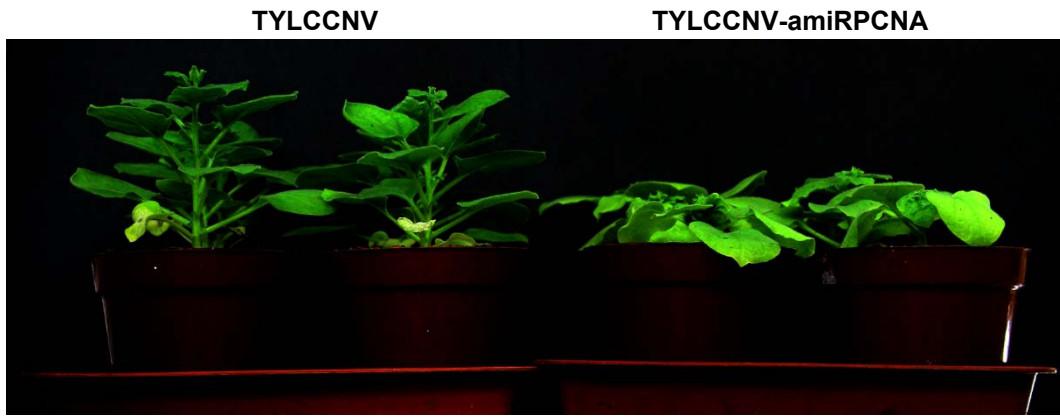

**Supplemental Figure S11.** Silence of *PCNA* by TYLCCNV-amiRPCNA in *N. benthamiana*. *PCNA*-silencing phenotype in *N. benthamiana* plants inoculated with TYLCCNV-amiRPCNA. TYLCCNV empty vector inoculated plants were used as negative control. Photographs were taken at 25 dpi.

TYLCCNV

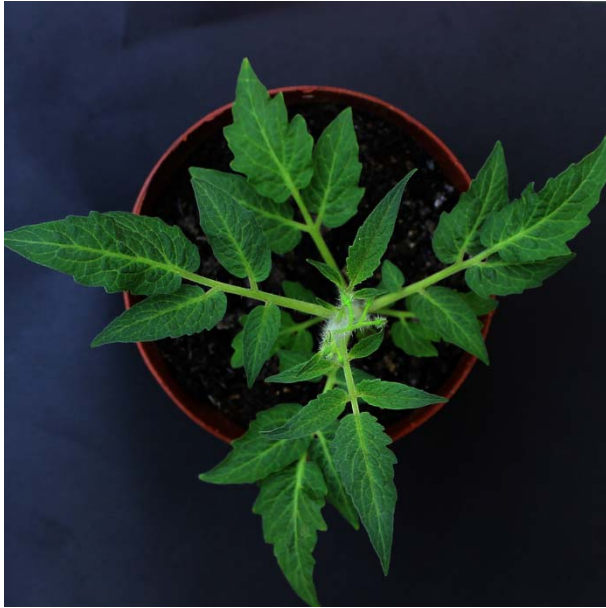

TYLCCNV-amiRPDS(390)

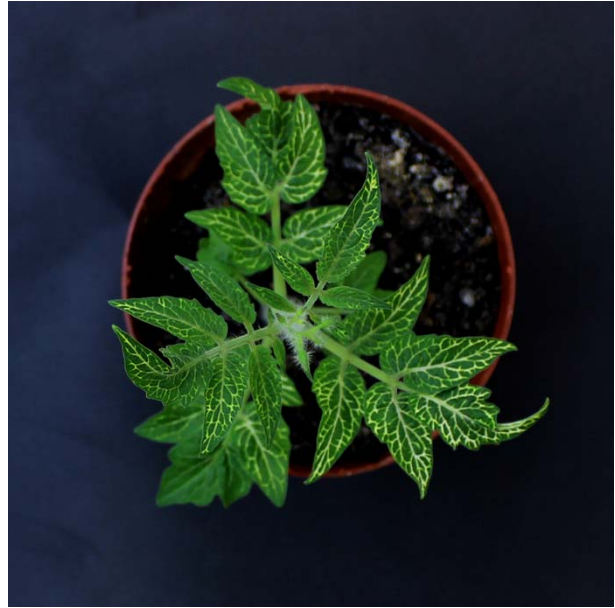

**Supplemental Figure S12.** *PDS*-silencing phenotype in tomato plants inoculated with TYLCCNV-amiRPDS(390). TYLCCNV empty vector inoculated plants were used as negative control. Photographs were taken at 4 weeks post infiltration.
