# Supplementary material
Source: PubMed Central journal article supplement (PMC5373046)
Supplement: supp_pp.16.01489_PP2016-01489R2_Supplemental_Tables.pdf [file supp_pp.16.01489_PP2016-01489R2_Supplemental_Tables.pdf]

**Supplemental Table S1.** The silencing efficiency of *PDS* gene by TYLCCNV-amiRPDS(319L) vectors in *N. benthamiana* plants at 30 dpi.

| Viral vectors         | MIR VIGS plants <sup>a</sup> |         |         | Average MIR VIGS efficiency (%) <sup>b</sup> |
|-----------------------|------------------------------|---------|---------|----------------------------------------------|
|                       | Group 1                      | Group 2 | Group 3 |                                              |
| TYLCCNV               | 0/6                          | 0/6     | 0/6     | 0 ± 0                                        |
| TYLCCNV-amiRPDS(319L) | 4/6                          | 5/6     | 3/6     | 67 ± 0.14                                    |

<sup>a</sup> MIR VIGS plants were expressed as *PDS* silenced plants/total agroinoculated plants;

<sup>b</sup> MIR VIGS efficiency was the ratio of *PDS* silenced plants to total Agroinoculated plants. Value indicated mean ± SD (n=3).

**Supplementary Table S2.** Lists of primers used in this study. Lists of primers used in plasmid construction, virus detection, RT-qPCR and northern blot analysis for genes and small RNAs.

| Primer name                     | Primer sequence (5'-3')*                                                       | Brief description                 |
|---------------------------------|--------------------------------------------------------------------------------|-----------------------------------|
| <b>For plasmid construction</b> |                                                                                |                                   |
| <i>Xba</i> I-ami-F              | GCTCTAGAGTTCATACACTTAATACT                                                     | For TYLCCNV-amiRPDS(319L) cloning |
| <i>Sma</i> I-ami-R              | TCCCCCGGGTGCCTTAAATAAAGAT                                                      |                                   |
| amiRPDS(athmiR319)-1            | GATCAACATAGACTGATTGGGGCTCT                                                     |                                   |
| amiRPDS(athmiR319)-2            | GAGCCCAATCAGTCTATGTTGATCA<br>AAGAGAATCAATGA                                    |                                   |
| amiRPDS(athmiR319)-3            | GAGACCAATCAGTCAATGTTGTTCA<br>CAGGTCGTGATATG                                    |                                   |
| amiRPDS(athmiR319)-4            | GAACAACATTGACTGATTGGTGCTCT<br>ACATATATTCCT                                     |                                   |
| <i>Xba</i> I-amiRPDS(319)-F     | GCTCTAGAGAGCACC AATCAGTCAAT<br>GTTGTTACAGGTCGTGATATG                           | For TYLCCNV- amiRPDS(319) cloning |
| <i>Sma</i> I-amiRPDS(319)-R     | TCCCCCGGGGAGCCCCAATCAGTCTA<br>TGTTGATCAAAGAGAATCAATGA                          |                                   |
| <i>Xba</i> I-amiRPDS(159)-F     | GCTCTAGACCCCCAATGTGTCTATGTT<br>GAAGAAGATCTAACAGTTAGA                           | For TYLCCNV- amiRPDS(159) cloning |
| <i>Sma</i> I-amiRPDS(159)-R     | TCCCCCGGGGCCCAATCAGTCTATG<br>TTGAAAATGATCAAACAAAGGGTA                          |                                   |
| <i>Xba</i> I-amiRPDS(390)-F     | GCTCTAGAAAAGTAGAGAAGAATCT<br>GTATCAACATAGACTGATTGGGGCAT<br>GATGATCACATTCGTTATC | For TYLCCNV- amiRPDS(390) cloning |
| amiRPDS(390)-R                  | TGTAGTAAGAAGAGCCAATGTCAAC<br>ATAGAATGATTGGGGCAAAAAATAGA<br>TAACGAAT            |                                   |
| <i>Xba</i> I-amiR156-F          | GCTCTAGAAAAGTAGAGAAGAATCT<br>GTATGACAGAAGAGAGTGAGCAC<br>ATGATGATCACATTCGTTATC  | For TYLCCNV-amiR156 cloning       |
| amiR156-R                       | TGTAGTAAGAAGAGCCAATGTGACA<br>GAAGATAGTGAGCACAAAAAATAGA<br>TAACGAAT             |                                   |
| <i>Xba</i> I-5'D(8)-F           | GCTCTAGAAAAGTAGAGAAGAATCT<br>GTATCTTGACCTTGTAAGGCCTTTAT<br>GATGATCACATTCGTTATC | For TYLCCNV-5'D8(+) cloning       |
| 5'D(8)-R                        | TGTAGTAAGAAGAGCCAATGTCTTG<br>ACCTTTTAAGGCCTTAAAAAATAG<br>ATAACGAAT             |                                   |

|                             |                                                                                 |                                          |
|-----------------------------|---------------------------------------------------------------------------------|------------------------------------------|
| <i>Xba</i> I-amiRSu-F       | GCTCTAGAAAAGTAGAGAAGAATCT<br>GTATAATTAGGATAAAATCGGGCCCA<br>TGATGATCACATTCGTTATC | For TYLCCNV-amiRSu cloning               |
| amiRSu-R                    | TGTAGTAAGAAGAGCCAATGTAATT<br>AGGATCAATCGGGCCCAAAAATAG<br>ATAACGAAT              |                                          |
| <i>Xba</i> I-amiRPCNA-F     | GCTCTAGAAAAGTAGAGAAGAATCT<br>GTATATAGTGCTCAAAACCTCACAT<br>GATGATCACATTCGTTATC   | For TYLCCNV-amiRPCNA<br>cloning          |
| amiRPCNA-R                  | TGTAGTAAGAAGAGCCAATGTATAG<br>TGCTCAAACCTCACAAAAATAG<br>ATAACGAAT                |                                          |
| <b>For virus detection</b>  |                                                                                 |                                          |
| DNA-A-F                     | CATCGTGTGGTAAGAGGTTTTG                                                          | For TYLCCNV DNA-A<br>detection           |
| DNA-A-R                     | TATACAGGATTACTTGCATGGGT                                                         |                                          |
| DNA-m $\beta$ -F            | ACATCGGTTCCCCTATTAGTGCC                                                         | For TYLCCNV DNA-m $\beta$<br>detection   |
| DNA-m $\beta$ -R            | GCTGCTGCGTAGCGTAGTGGT                                                           |                                          |
| <b>For RT-qPCR of genes</b> |                                                                                 |                                          |
| Nb <i>lF4a</i> -qF          | GCTTTGGTCTTGGCACCTACTC                                                          | RT-qPCR primers for <i>lF4a</i>          |
| Nb <i>lF4a</i> -qR          | TGCTCGCATGACCTTTTCAA                                                            |                                          |
| Nb <i>PDS</i> -qF           | GGCGGCGTTATTATCATC                                                              | RT-qPCR primers for <i>PDS</i>           |
| Nb <i>PDS</i> -qR           | ACCAATCTCCATCATCATCT                                                            |                                          |
| pri-319-qF                  | TTCCGACTCATTATCCAA                                                              | RT-qPCR primers for pri-<br>amiRPDS(319) |
| pri-319-qR                  | CTACCGCATCATTATTCAT                                                             |                                          |
| pri-159-qF                  | GCTGCTGACCTATGGATT                                                              | RT-qPCR primers for pri-<br>amiRPDS(159) |
| pri-159-qR                  | TCAAACAAAGGGTAAAATAAAGC                                                         |                                          |
| pri-390-qF                  | GCGGCAAAGTAGAGAAGAATCTGTA                                                       | RT-qPCR primers for pri-<br>amiRPDS(390) |
| pri-390-qR                  | GCGTGATAGTAAGAAGAGCCAA                                                          |                                          |
| TC17947-qF                  | GCACAGTGAAGACAGTA                                                               | RT-qPCR primers for <i>TC17947</i>       |
| TC17947-qR                  | ACGATGATAGTTAGATATGAAGGA                                                        |                                          |
| TC24007-qF                  | CACTCTAACGGTTATCATCCT                                                           | RT-qPCR primers for <i>TC24007</i>       |
| TC24007-qR                  | CAACAGACAGCCTCACAA                                                              |                                          |
| Nb <i>ARF3</i> -qF          | GGCAAGTGATGAGGTCTA                                                              | RT-qPCR primers for <i>NbARF3</i>        |
| Nb <i>ARF3</i> -qR          | GTATCCGAAGCAGTGAGA                                                              |                                          |
| Nb <i>ARF4</i> -qF          | TTACCACCACTGAGCATTC                                                             | RT-qPCR primers for <i>NbARF4</i>        |
| Nb <i>ARF4</i> -qR          | GGCGGACTGTCTTATCAC                                                              |                                          |
| Nb <i>Su</i> -qF            | CCAGATGACCAAGAAGTAATG                                                           | RT-qPCR primers for <i>Su</i>            |

|                                   |                                                        |                                                                                                 |
|-----------------------------------|--------------------------------------------------------|-------------------------------------------------------------------------------------------------|
| <b>NbSu-qR</b>                    | TGTCCTCAGTAGCACCTA                                     |                                                                                                 |
| <b>NbPCNA-qF</b>                  | AGAGATGAATGAGCCAGTAT                                   | RT-qPCR primers for <i>PCNA</i>                                                                 |
| <b>NbPCNA-qR</b>                  | TTAGGTGCCAGGTAGAAC                                     |                                                                                                 |
| <b>For RT-qPCR of small RNAs</b>  |                                                        |                                                                                                 |
| <b>universal-qR</b>               | GTGCAGGGTCCGAGGT                                       | Universal reverse primer for all miRNA end-point stem-loop RT-qPCR                              |
| <b>amiRPDS-RT</b>                 | GTTGGCTCTGGTGCAGGGTCCGAGG<br>TATTCGCACCAGAGCCAACGCCCA  | RT primer for amiRPDS                                                                           |
| <b>amiRPDS-qF</b>                 | CCGGCTCAACATAGACTGAT                                   | Forward primer for qPCR analysis of amiRPDS                                                     |
| <b>amiR156-RT</b>                 | GTTGGCTCTGGTGCAGGGTCCGAGG<br>TATTCGCACCAGAGCCAACGTGCTC | RT primer for amiR156                                                                           |
| <b>amiR156-qF</b>                 | CCGGCTGACAGAAGAGAGTG                                   | Forward primer for qPCR analysis of amiR156                                                     |
| <b>5'D8(+)-RT</b>                 | GTTGGCTCTGGTGCAGGGTCCGAGG<br>TATTCGCACCAGAGCCAACAAAGGC | RT primer for 5'D8(+)                                                                           |
| <b>5'D8(+)-qF</b>                 | CCGGCTCTTGACCTTGTAAG                                   | Forward primer for qPCR analysis of 5'D8(+)                                                     |
| <b>amiRSu-RT</b>                  | GTTGGCTCTGGTGCAGGGTCCGAGG<br>TATTCGCACCAGAGCCAACGGGCC  | RT primer for amiRPDS                                                                           |
| <b>amiRSu-qF</b>                  | GCCCCGGCGTAATTAGGATAAATC                               | Forward primer for qPCR analysis of amiRPDS                                                     |
| <b>amiRPCNA-RT</b>                | GTTGGCTCTGGTGCAGGGTCCGAGG<br>TATTCGCACCAGAGCCAACGTGAGG | RT primer for amiRPCNA                                                                          |
| <b>amiRPCNA-qF</b>                | CCGGCTATAGTGCTCAAAC                                    | Forward primer for qPCR analysis of amiRPCNA                                                    |
| <b>For northern blot analysis</b> |                                                        |                                                                                                 |
| <b>U6-probe</b>                   | TTGCGTGTATCCTTGCAGG                                    | For northern blot assay of U6                                                                   |
| <b>amiRPDS-probe</b>              | GCCCCAATCAGTCTATGTTGA                                  | For northern blot assays of amiRPDS and pri-amiRPDS                                             |
| <b>PDS-PF</b>                     | GCTCTAGACAAGTGCCACGACCCGA<br>AG                        | Primers for amplifying <i>PDS</i> fragment to produce <i>PDS</i> probe                          |
| <b>PDS-PR</b>                     | CGAGCTCGCATCGAAAGCTCGTCAG<br>G                         |                                                                                                 |
| <b>PDS-PT7R</b>                   | TAATACGACTCACTATAGGGCGAGCT<br>CGCATCGAAAGCTCGTCAGG     | Reverse primer for adding T7 promoter in 3' <i>PDS</i> fragment to produce <i>PDS</i> RNA probe |

\*Restriction sites were shown underline.

**Supplemental Table S3.** The silencing efficiency of *PDS* gene by TYLCCNV-amiRPDS(319), TYLCCNV-amiRPDS(159) and TYLCCNV-amiRPDS(390) vectors in *N. benthamiana* plants at 25 dpi.

| Viral vectors        | MIR VIGS plants <sup>a</sup> |         |         | Average MIR VIGS efficiency (%) <sup>b</sup> |
|----------------------|------------------------------|---------|---------|----------------------------------------------|
|                      | Group 1                      | Group 2 | Group 3 |                                              |
| TYLCCNV              | 0/6                          | 0/6     | 0/6     | 0 ± 0                                        |
| TYLCCNV-amiRPDS(319) | 6/6                          | 6/6     | 6/6     | 100 ± 0                                      |
| TYLCCNV-amiRPDS(159) | 6/6                          | 6/6     | 6/6     | 100 ± 0                                      |
| TYLCCNV-amiRPDS(390) | 6/6                          | 6/6     | 6/6     | 100 ± 0                                      |

<sup>a</sup> MIR VIGS plants were expressed as *PDS* silenced plants/total agroinoculated plants;

<sup>b</sup> MIR VIGS efficiency was the ratio of *PDS* silenced plants to total agroinoculated plants. Value indicated mean ± SD (n=3).

**Supplemental Table S4.** The silencing efficiency of overexpressing miR156 by TYLCCNV-amiR156 vectors in *N. benthamiana* plants at 14 dpi.

| Viral vectors   | MIR VIGS plants <sup>a</sup> |         |         | Average MIR VIGS efficiency (%) <sup>b</sup> |
|-----------------|------------------------------|---------|---------|----------------------------------------------|
|                 | Group 1                      | Group 2 | Group 3 |                                              |
| TYLCCNV         | 0/6                          | 0/6     | 0/6     | 0 ± 0                                        |
| TYLCCNV-amiR156 | 4/6                          | 4/6     | 5/6     | 72 ± 0.08                                    |

<sup>a</sup> MIR VIGS plants were expressed as miR156 overexpression plants/total Agroinoculated plants;

<sup>b</sup> MIR VIGS efficiency was the ratio of the efficiency of miR156 overexpression plants to total Agroinoculated plants.

Value indicated mean ± SD (n=3).

**Supplemental Table S5.** The silencing efficiency of overexpressing 5'D8(+) by TYLCCNV-5'D8(+) vectors in *N. benthamiana* plants at 30 dpi.

| Viral vectors   | MIR VIGS plants <sup>a</sup> |         |         | Average MIR VIGS efficiency (%) <sup>b</sup> |
|-----------------|------------------------------|---------|---------|----------------------------------------------|
|                 | Group 1                      | Group 2 | Group 3 |                                              |
| TYLCCNV         | 0/6                          | 0/6     | 0/6     | 0 ± 0                                        |
| TYLCCNV-5'D8(+) | 4/6                          | 5/6     | 5/6     | 78 ± 0.08                                    |

<sup>a</sup> MIR VIGS plants were expressed as 5'D8(+) overexpression plants/total Agroinoculated plants;

<sup>b</sup> MIR VIGS efficiency was the ratio of the efficiency of 5'D8(+) overexpression plants to total Agroinoculated plants.

Value indicated mean ± SD (n=3).



**Supplemental Table S6.** The silencing efficiency of *Su* gene by TYLCCNV-amiRSu vectors in *N. benthamiana* plants at 25 dpi.

| Viral vectors  | MIR VIGS plants <sup>a</sup> |         |         | Average MIR VIGS efficiency (%) <sup>b</sup> |
|----------------|------------------------------|---------|---------|----------------------------------------------|
|                | Group 1                      | Group 2 | Group 3 |                                              |
| TYLCCNV        | 0/6                          | 0/6     | 0/6     | 0 ± 0                                        |
| TYLCCNV-amiRSu | 6/6                          | 6/6     | 6/6     | 100 ± 0                                      |

<sup>a</sup> MIR VIGS plants were expressed as *Su* silenced plants/total Agroinoculated plants;

<sup>b</sup> MIR VIGS efficiency was the ratio of *Su* silenced plants to total Agroinoculated plants. Value indicated mean ± SD (n=3).

**Supplemental Table S7.** The silencing efficiency of *PCNA* gene by TYLCCNV-amiRPCNA vectors in *N. benthamiana* plants at 25 dpi.

| Viral vectors    | MIR VIGS plants <sup>a</sup> |         |         | Average MIR VIGS efficiency (%) <sup>b</sup> |
|------------------|------------------------------|---------|---------|----------------------------------------------|
|                  | Group 1                      | Group 2 | Group 3 |                                              |
| TYLCCNV          | 0/6                          | 0/6     | 0/6     | 0 ± 0                                        |
| TYLCCNV-amiRPCNA | 6/6                          | 6/6     | 6/6     | 100 ± 0                                      |

<sup>a</sup> MIR VIGS plants were expressed as *PCNA* silenced plants/total Agroinoculated plants;

<sup>b</sup> MIR VIGS efficiency was the ratio of *PCNA* silenced plants to total Agroinoculated plants. Value indicated mean ± SD (n=3).
