# Supplementary material
Source: PubMed Central journal article supplement (PMC5373046)
Supplement: supp_pp.16.01489_PP2016-01489R2_Supplemental_Text.pdf [file supp_pp.16.01489_PP2016-01489R2_Supplemental_Text.pdf]

**Supplementary Text S1.** Sequences of pri-miRNA (5'-3')\*.

**1. pri-miRPDS(319L) 368 bp**

G TTCATACACTTAATACTCGCTGTTTTGAATTGATGTTTTAGGAATATATATGT  
AGAGC**ACCAATCAGTCAATGTTGTT**CACAGGTCGTGATATGATTCAATTAGC  
TTCCGACTCATTTCATCCAAATACCGAGTCGCCAAAATTCAAACCTAGACTCG  
TTAAATGAATGAATGATGCGGTAGACAAATTGGATCATTGATTCTCTTTGAT  
**CAACATAGACTGATTGGGGC**TCTCTCTTTTGTATTCCAATTTTCTTGATTAAT  
CTTTCCTGCACAAAACATGCTTGATCCACTAAGTGACATATATGCTGCCTT  
CGTATATATAGTTCTGGTAAAATTAACATTTTGGGTTTATCTTTATTTAAGGCA

**2. pri-miRPDS(319) 176 bp**

GAGC**ACCAATCAGTCAATGTTGTT**CACAGGTCGTGATATGATTCAATTAGCT  
TCCGACTCATTTCATCCAAATACCGAGTCGCCAAAATTCAAACCTAGACTCGT  
TAAATGAATGAATGATGCGGTAGACAAATTGGATCATTGATTCTCTTTGATC  
**AACATAGACTGATTGGGGC**TC

**3. pri-miRPDS(159) 178 bp**

G**CCCAATCAGGATATGTTGCAG**AAGATCTAACAGGTTAGATTGAGCTGCT  
GACCTATGGATTCCCTCAGCCCTATCTATTTATGATTTCAAACATATAGATAGG  
TTTTGGGTTTGCATATGTCAGGAGCTTTATTTTACCCTTTGTTTGATCATTTT  
**CAACATAGACTGATTGGGGC**

**4. pri-miRPDS(390) 111 bp**

AAAGTAGAGAAGAATCTGTAT**CAACATAGACTGATTGGGGC**ATGATGATCA  
CATTGTTATCTATTTTTTG**CCCAATCATTCTATGTTGAC**ATTGGCTCTTCTT  
ACTACA

**5. pri-miR156 109 bp**

AAAGTAGAGAAGAATCTGTAT**AGACAGAAGAGAGTGAGCAC**ATGATGATCA  
CATTGTTATCTATTTTTTG**GCTCACTATCTTCTGTCAC**ATTGGCTCTTCTTA  
CTACA

**6. pri-5'D8(+) 111 bp**

AAAGTAGAGAAGAATCTGTAT**CTTGACCTTGTAAGGCCTTT**ATGATGATCAC  
ATTCGTTATCTATTTTTTAA**GGGCCTTAAAGGTCAAGACA**ATTGGCTCTTCT

TACTACA

**7. pri-amiRSu 111 bp**

AAAGTAGAGAAGAATCTGTATAATTAGGATAAATCGGGCCCATGATGATCA  
CATTTCGTTATCTATTTTTTGGGCCCGATTGATCCTAATTACATTGGCTCTTCT  
TACTACA

**8. pri-amiRPCNA 111 bp**

AAAGTAGAGAAGAATCTGTATATAGTGCTCAAACCCTCACATGATGATCA  
CATTTCGTTATCTATTTTTTGTGAGGGTTTGGAGCACTATACATTGGCTCTTC  
TTACTACA

\* Sequence in red color means amiRNA, and in blue color means amiRNA\*.
